# Supplementary material
Source: MDPI journal article supplement (https://www.mdpi.com/2673-4591/19/1/25)

**ECP**  
**2022**

**The 1st International Electronic Conference  
on Processes: Processes System Innovation**

17-31 MAY 2022 | ONLINE

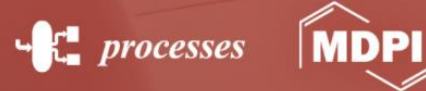

**utad** UNIVERSIDADE  
DE TRÁS-OS-MONTES  
E ALTO DOURO

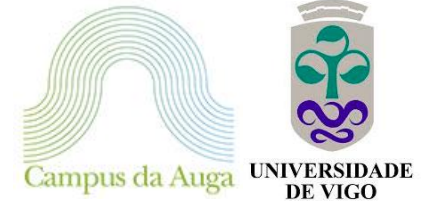

 AOPs PhD School

 **CQVR** VR  
CENTRO  
DE QUÍMICA  
VILA REAL

# Treatment of winery wastewater by an EDDS-photo-Fenton process. Assessment of UV-C, UV-A and solar radiation

Nuno Jorge<sup>1,2</sup> \*; Carlos Amor<sup>2</sup>; Ana R. Teixeira<sup>2</sup>; Leonilde Marchão<sup>2</sup>; Marco S. Lucas<sup>2</sup>; José A. Peres<sup>2</sup>

<sup>1</sup> Escuela Internacional de Doctorado (EIDO), Campus da Auga, Campus Universitario de Ourense, Universidade de Vigo, As Lagoas, 32004, Ourense, Spain

<sup>2</sup> Centro de Química de Vila Real (CQVR), Departamento de Química, Universidade de Trás-os-Montes e Alto Douro (UTAD), Quinta de Prados, 5001-801, Vila Real, Portugal

\* njorge@uvigo.es

**The 1st International Electronic Conference on Processes: Processes System Innovation**

**Session 2. Environmental and Green Processes**

17 – 31 May 2022

# Winery wastewater main characteristics

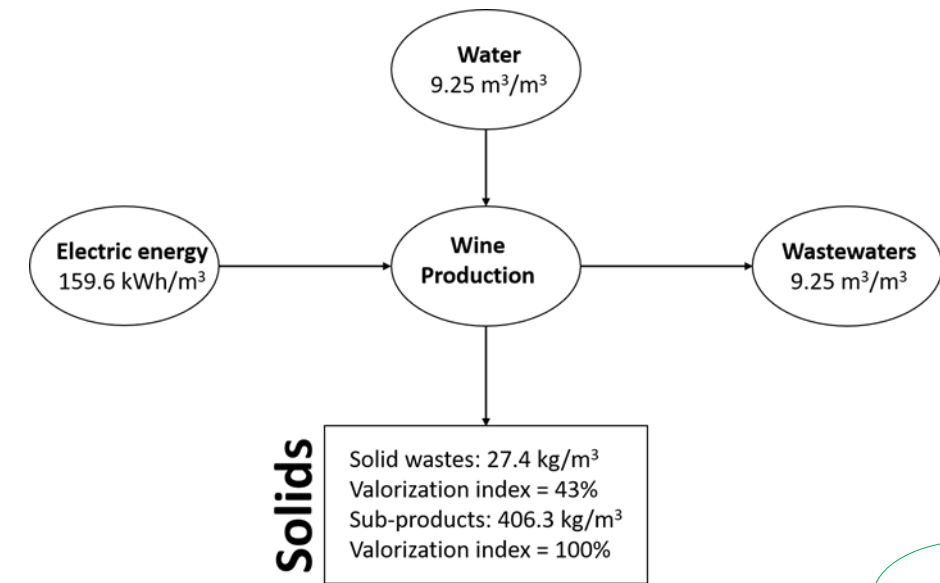

Mass balance applied to ACPB winery representing specific values, i.e., values per cubic meter of produced wine. Losses of water by evaporation were neglected [1].

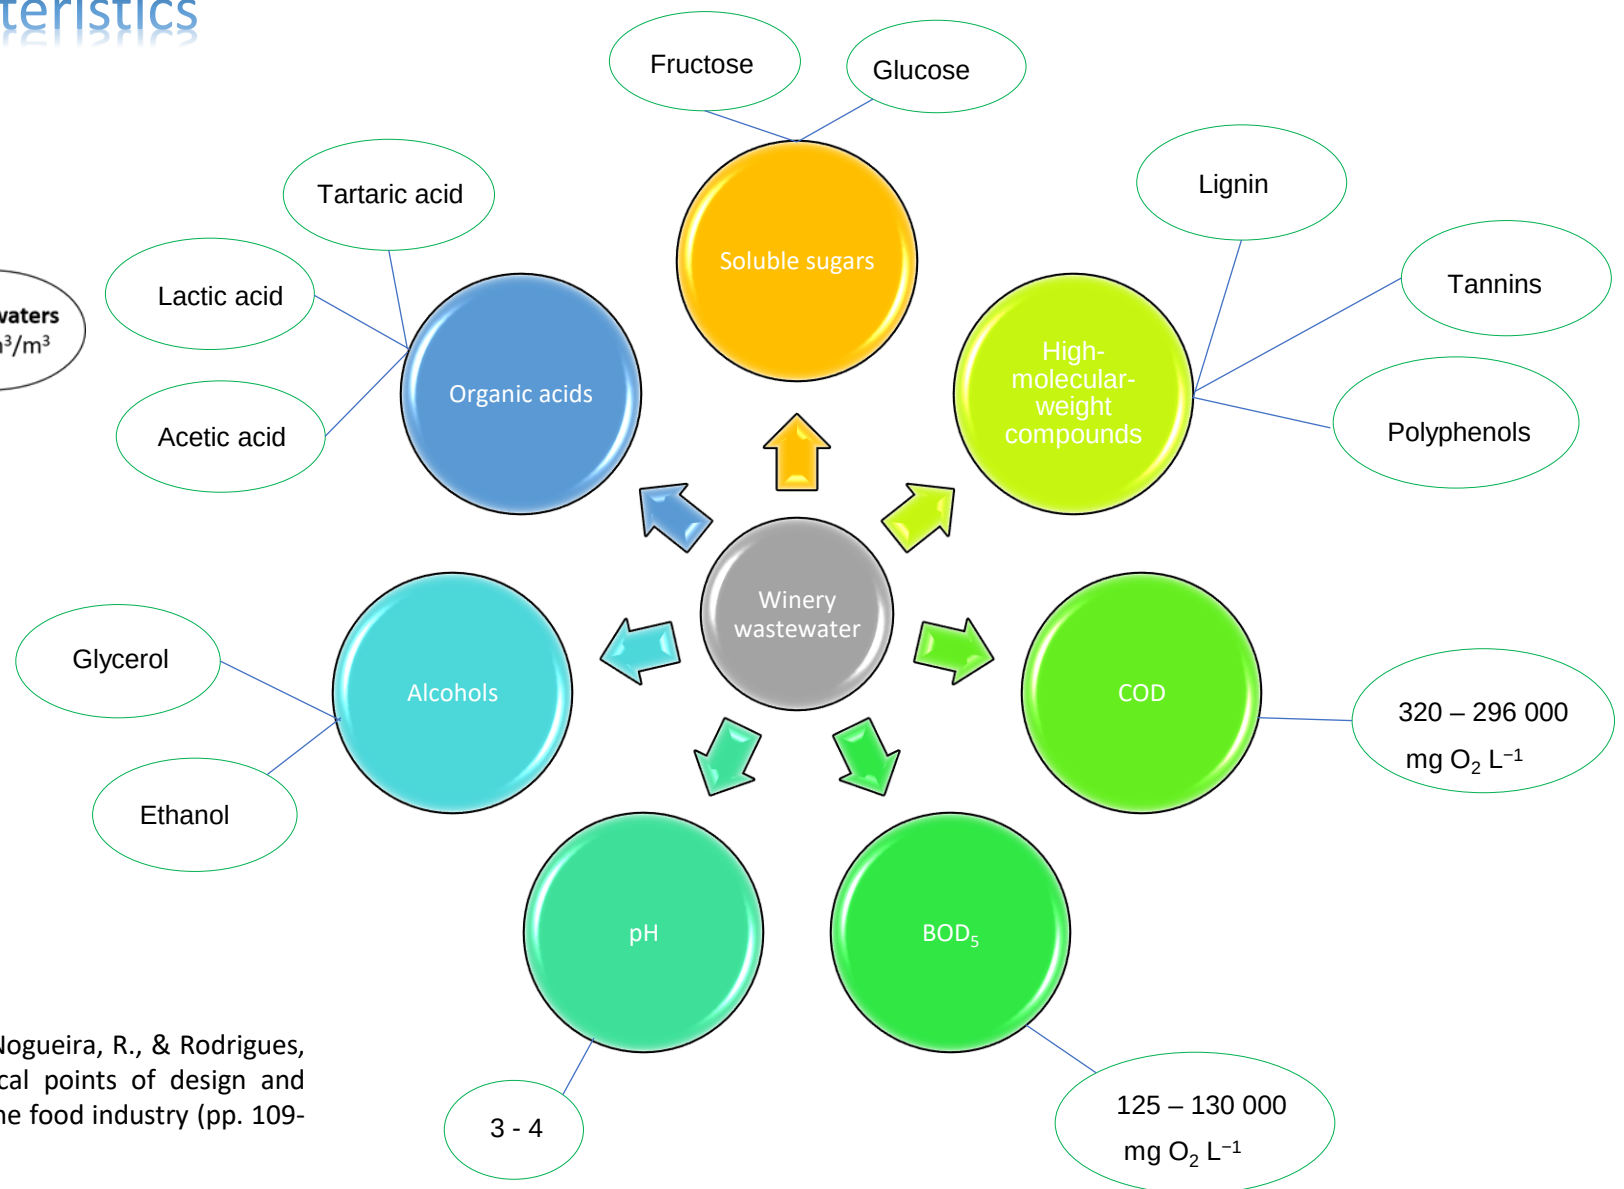

[1] Brito, A. G., Peixoto, J., Oliveira, J. M., Oliveira, J. A., Costa, C., Nogueira, R., & Rodrigues, A. (2007). Brewery and winery wastewater treatment: some focal points of design and operation. In Utilization of by-products and treatment of waste in the food industry (pp. 109-131). Springer, Boston, MA.

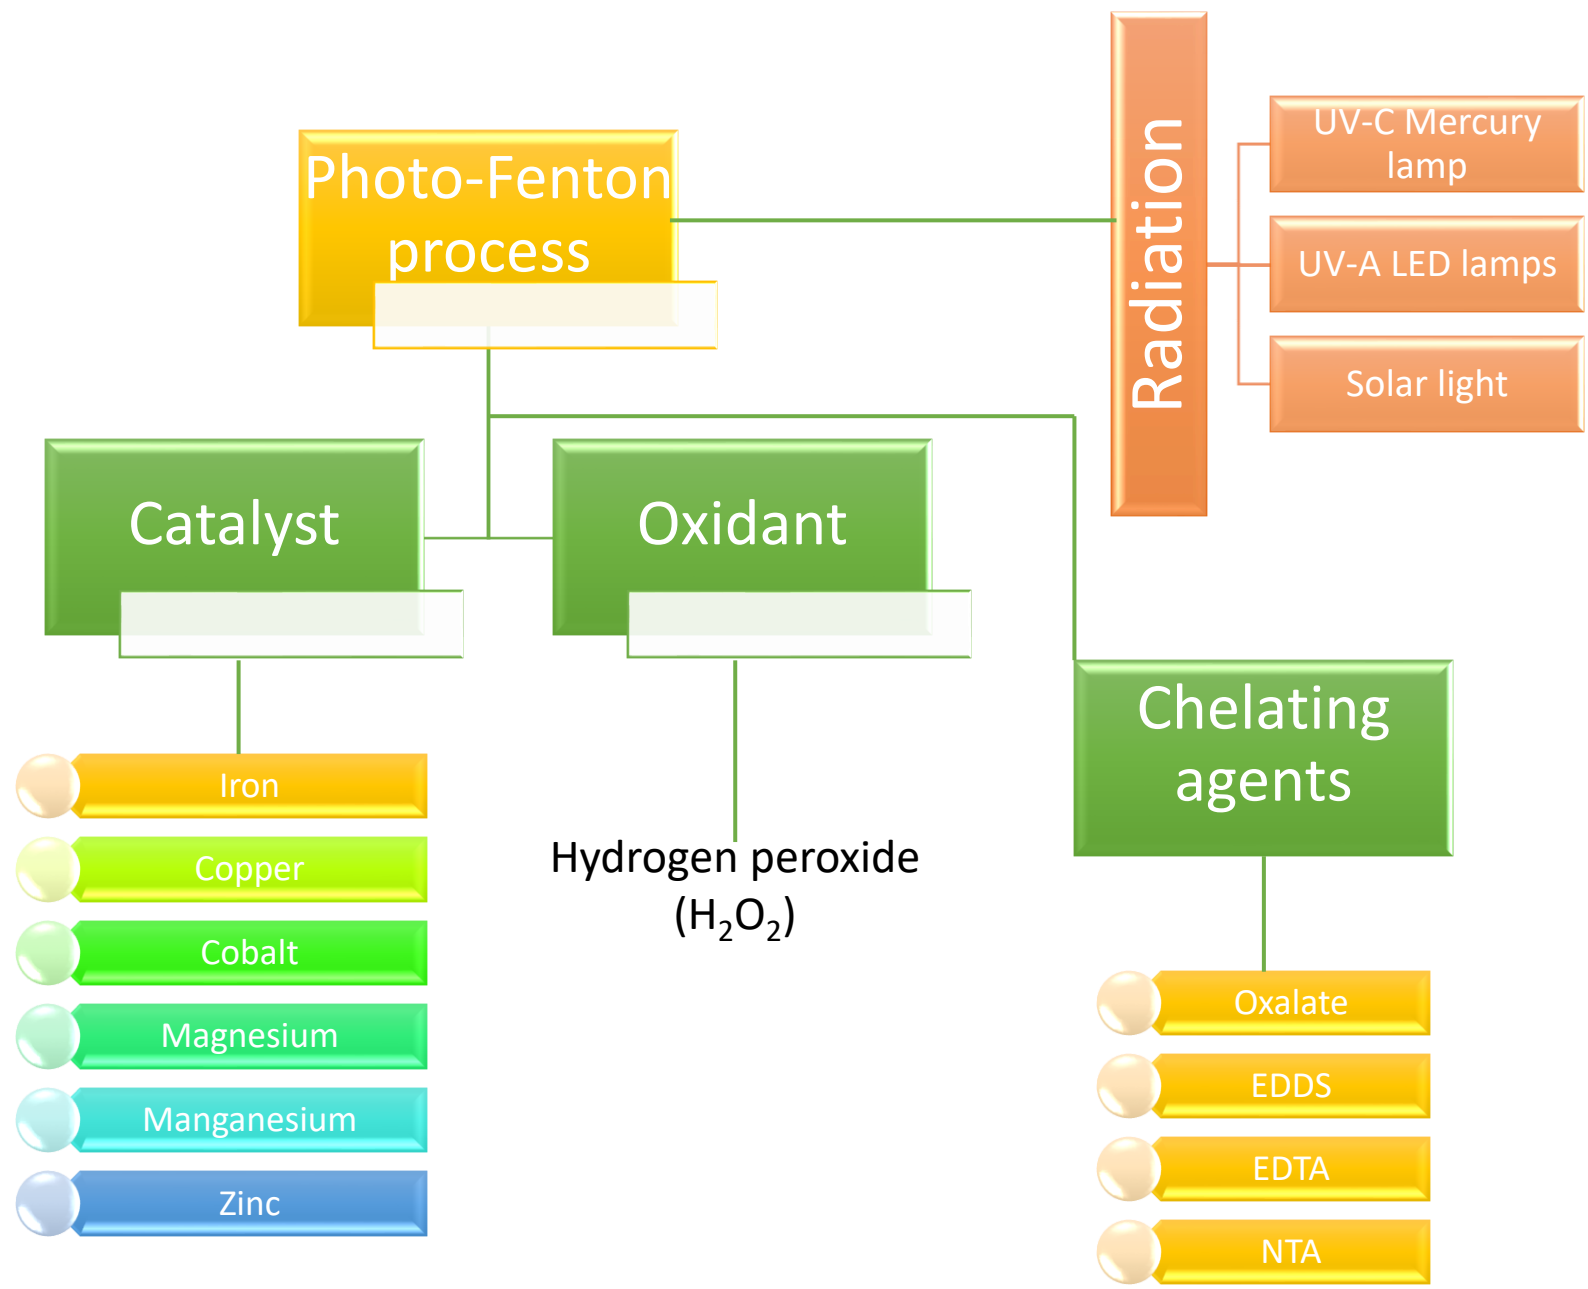

Chemical Engineering Journal 256 (2014) 316–323

Contents lists available at [ScienceDirect](#)

 **Chemical Engineering Journal**

journal homepage: [www.elsevier.com/locate/cej](http://www.elsevier.com/locate/cej)

Chemical Engineering Journal

Enhanced decolorization of Orange G in a Fe(II)-EDDS activated persulfate process by accelerating the regeneration of ferrous iron with hydroxylamine

Donghui Han<sup>a</sup>, Jinqun Wan<sup>a,c,d,\*</sup>, Yongwen Ma<sup>a,c,d</sup>, Yan Wang<sup>a</sup>, Mingzhi Huang<sup>b</sup>, Yangmei Chen<sup>c</sup>, Dongya Li<sup>a</sup>, Zeyu Guan<sup>a</sup>, Ying Li<sup>a</sup>

<sup>a</sup>College of Environment and Energy, South China University of Technology, Guangzhou 510006, China  
<sup>b</sup>Department of Water Resources and Environment, Sun Yat-sen University, Guangzhou 510275, China  
<sup>c</sup>State Key Laboratory of Pulp and Paper Engineering, South China University of Technology, Guangzhou 510640, China  
<sup>d</sup>The Key Lab of Pollution Control and Ecosystem Restoration in Industry Clusters, Ministry of Education, South China University of Technology, Guangzhou 510006, China  
<sup>\*</sup>School of Chemistry and Chemical Engineering, South China University of Technology, Guangzhou 510640, China

Chemical Engineering Journal 309 (2017) 80–88

Contents lists available at [ScienceDirect](#)

 **Chemical Engineering Journal**

journal homepage: [www.elsevier.com/locate/cej](http://www.elsevier.com/locate/cej)

Chemical Engineering Journal

Degradation of ethylbenzene in aqueous solution by sodium percarbonate activated with EDDS–Fe(III) complex

Hang Cui<sup>a</sup>, Xiaogang Gu<sup>a</sup>, Shuguang Lu<sup>a,\*</sup>, Xiaori Fu<sup>a</sup>, Xiang Zhang<sup>a</sup>, George Y. Fu<sup>b</sup>, Zhaofu Qiu<sup>a</sup>, Qian Sun<sup>a</sup>

<sup>a</sup>State Environmental Protection Key Laboratory of Environmental Risk Assessment and Control on Chemical Process, East China University of Science and Technology, Shanghai 200237, China  
<sup>b</sup>Department of Construction Management & Civil Engineering Technology, Georgia Southern University, Statesboro, GA 30460-8047, USA

Chemical Engineering Journal 310 (2017) 473–483

Contents lists available at [ScienceDirect](#)

 **Chemical Engineering Journal**

journal homepage: [www.elsevier.com/locate/cej](http://www.elsevier.com/locate/cej)

Chemical Engineering Journal

Treatment of winery wastewater by sulphate radicals: HSO<sub>5</sub><sup>-</sup>/transition metal/UV-A LEDs

Jorge Rodríguez-Chueca<sup>a</sup>, Carlos Amor<sup>a</sup>, Tânia Silva<sup>a</sup>, Dionysios D. Dionysiou<sup>b</sup>, Gianluca Li Puma<sup>c</sup>, Marco S. Lucas<sup>a,c,\*</sup>, José A. Peres<sup>a</sup>

<sup>a</sup>Centro de Química de Vila Real, Departamento de Química, UTAD – Universidade de Trás-os-Montes e Alto Douro, 5000-801 Vila Real, Portugal  
<sup>b</sup>Environmental Engineering and Science Program, Department of Biomedical, Chemical and Environmental Engineering (DBCEE), 705 Engineering Research Center, University of Cincinnati, Cincinnati, OH 45221-0012, USA  
<sup>c</sup>Environmental Nanocatalysis and Photoreaction Engineering, Department of Chemical Engineering, Loughborough University, Loughborough LE11 3TU, United Kingdom

The aim of this work is

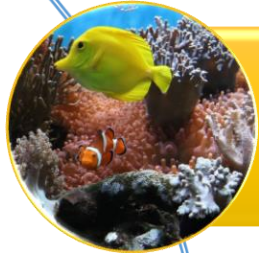

(1) Study the impact of EDDS on  $\text{Fe}^{2+}$  regeneration in photo-Fenton process

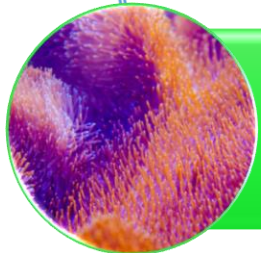

(2) Study the effects of EDDS and HA on hydroxyl radical production in photo-Fenton process

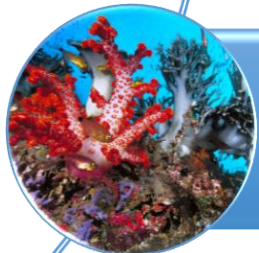

(3) Study the impact of radiation type in organic matter removal

# Winery wastewater characterization

Main chemical characteristics of winery wastewater (WW)

| Parameters                                                          | Portuguese Law Decree nº 236/98 | WW   |
|---------------------------------------------------------------------|---------------------------------|------|
| pH                                                                  | 6.0-9.0                         | 4.0  |
| Biochemical Oxygen Demand - BOD <sub>5</sub> (mg O <sub>2</sub> /L) | 40                              | 550  |
| Chemical Oxygen Demand - COD (mg O <sub>2</sub> /L)                 | 150                             | 2145 |
| Biodegradability – BOD <sub>5</sub> /COD                            |                                 | 0.26 |
| Total Organic Carbon – TOC (mg C/L)                                 |                                 | 400  |
| Turbidity (NTU)                                                     |                                 | 296  |
| Total suspended solids – TSS (mg/L)                                 | 60                              | 750  |
| Electrical conductivity (µS/cm)                                     |                                 | 62.5 |
| Total polyphenols (mg gallic acid/L)                                | 0.5                             | 22.6 |
| Iron (mg/L)                                                         | 2.0                             | 0.05 |
| Aluminium (mg/L)                                                    | 10.0                            |      |
| Cobalt (mg/L)                                                       |                                 | 0.00 |
| Manganese (mg/L)                                                    | 2.0                             |      |
| Potassium (mg/L)                                                    |                                 | 20.5 |
| Calcium (mg/L)                                                      |                                 | 1.07 |
| Magnesium (mg/L)                                                    |                                 | 0.51 |
| Sodium (mg/L)                                                       |                                 | 0.19 |

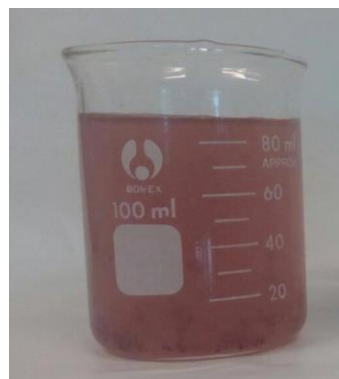

Winery wastewater used in this work

## Winery wastewater collection and storage

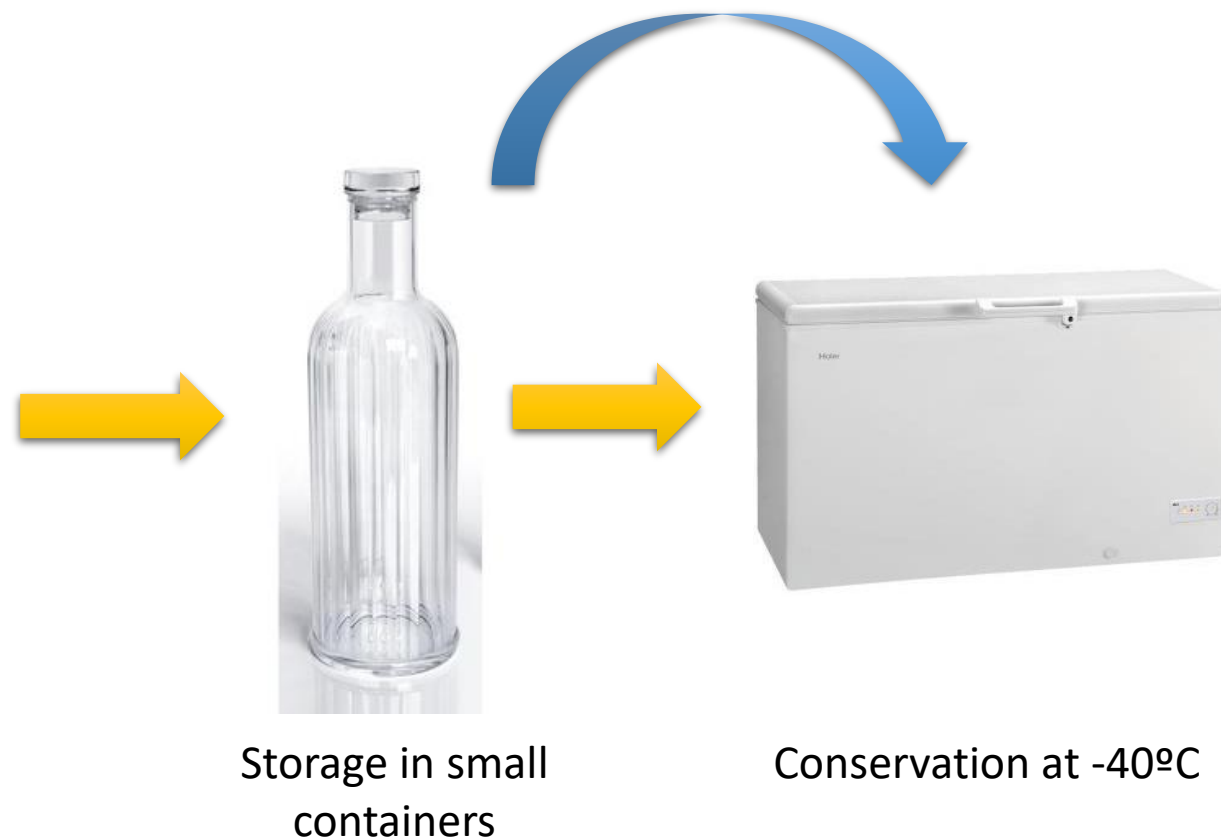

# Equipment used in photo-Fenton process

UV-A LED reactor

UV-C mercury lamp reactor

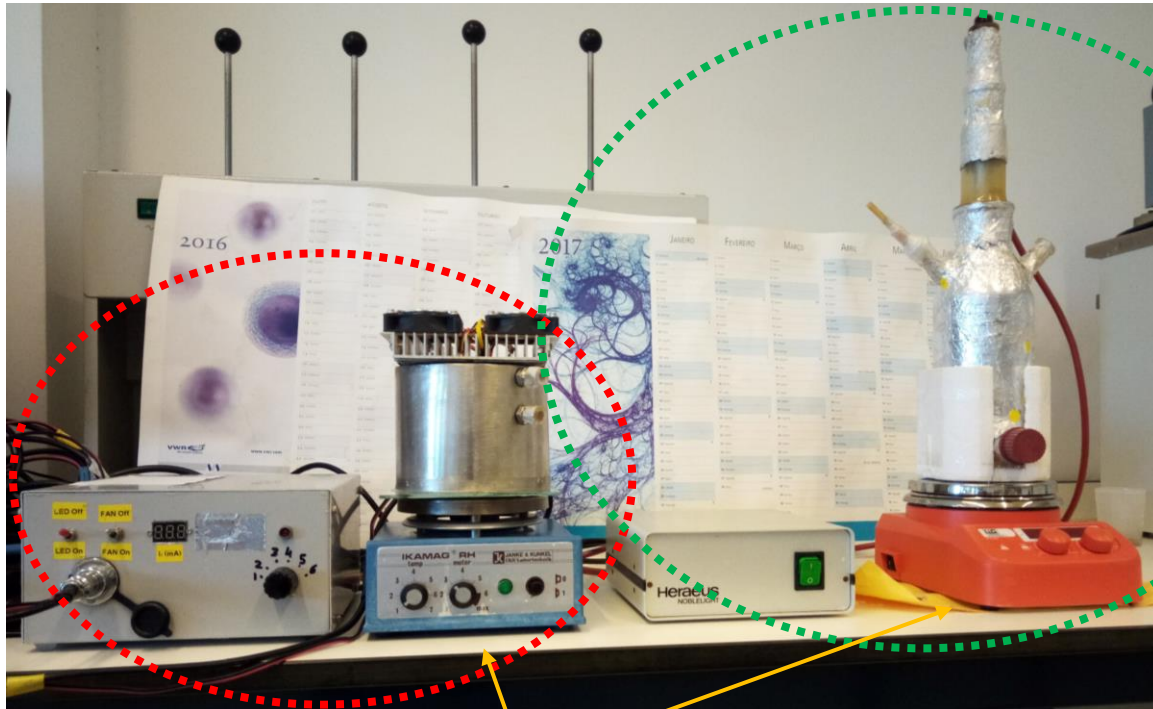

Magnetic agitators

Solar reactor

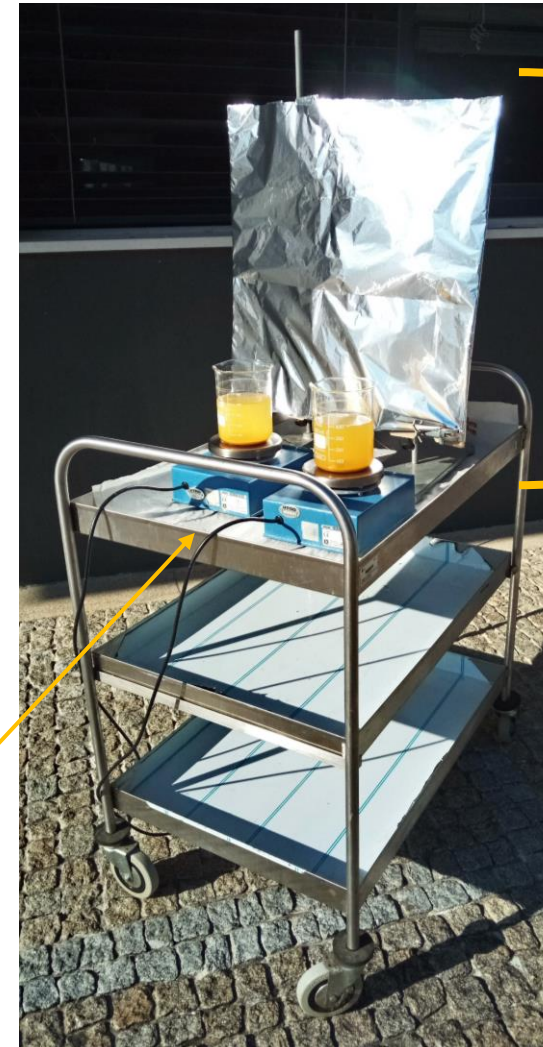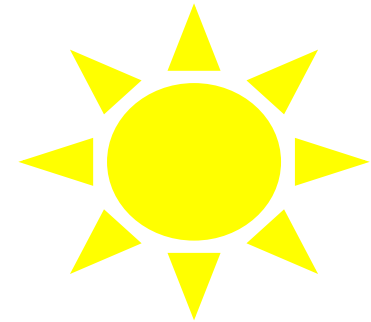

Silver coated panel

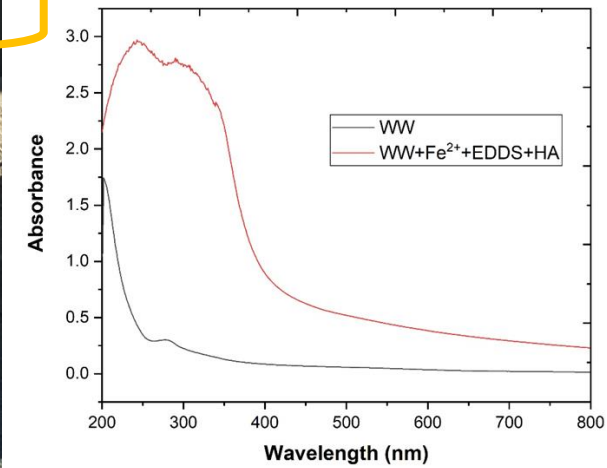

UV absorption spectra corresponding to WW and WW+Fe<sup>2+</sup>+EDDS+HA.

# Results and discussion

- (1) Variation of [H<sub>2</sub>O<sub>2</sub>]
- (2) Variation of [Fe<sup>2+</sup>]

- (3) Variation of catalyst type
- (4) Variation of the EDDS dosage

- (5) Variation of the HA dosage
- (6) Variation of radiation type vs pH

Effect of catalyst type

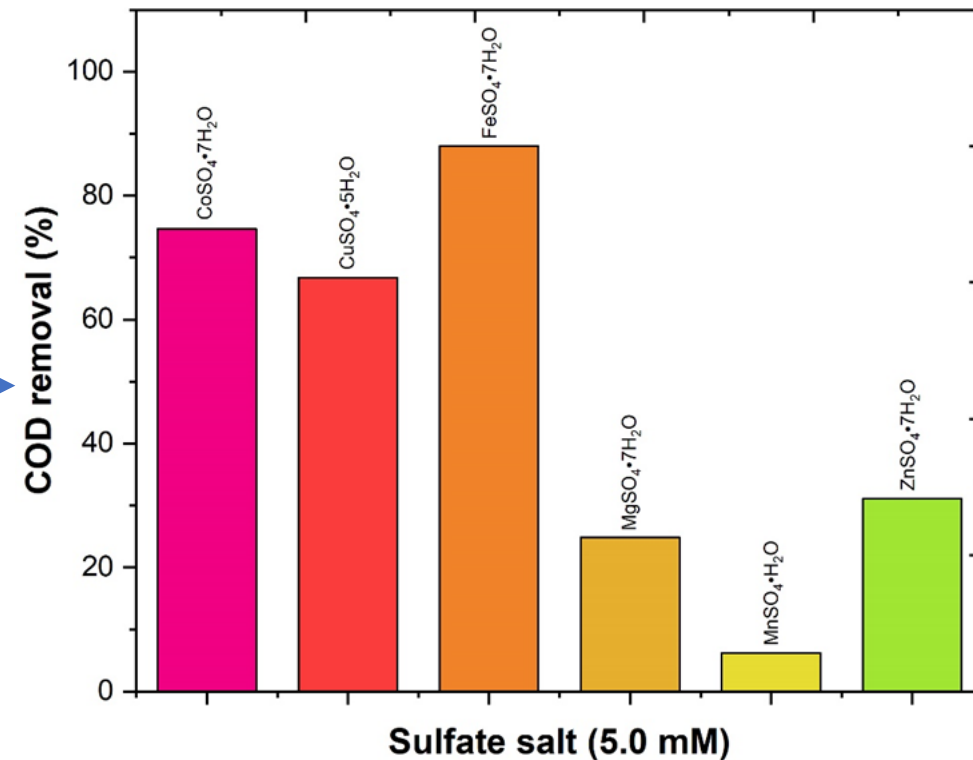

Influence of different sulfate salts in the removal of COD.

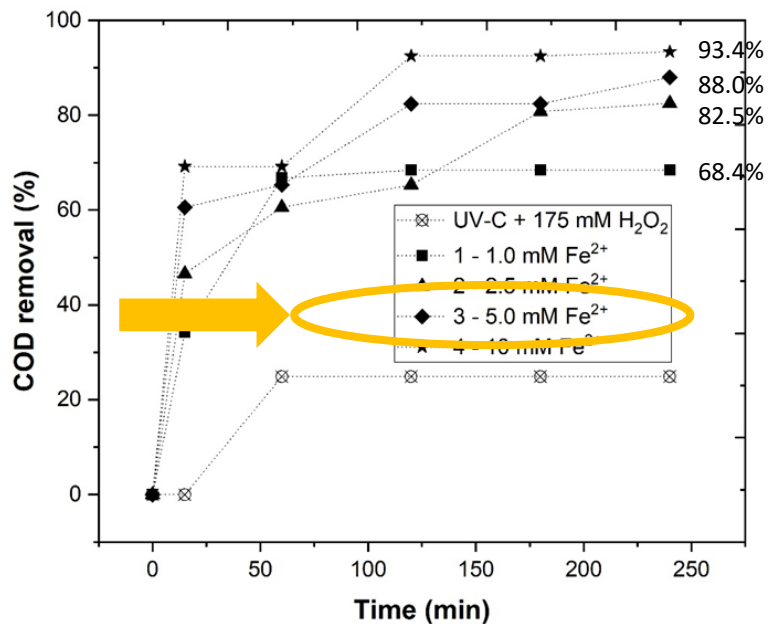

Evolution of COD removal through the photo-Fenton experiments, using different catalyst dosages

Effect of catalyst concentration

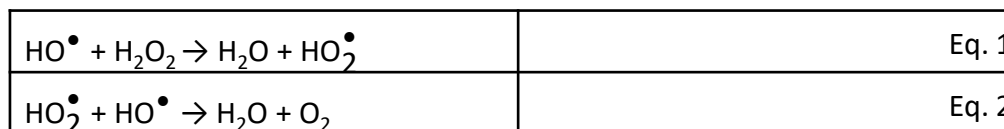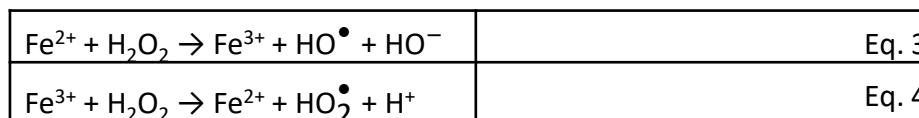

# Results and discussion

- (1) Variation of  $[H_2O_2]$
- (2) Variation of  $[Fe^{2+}]$

- (3) Variation of catalyst type
- (4) Variation of the EDDS dosage

- (5) Variation of the HA dosage
- (6) Variation of radiation type vs pH

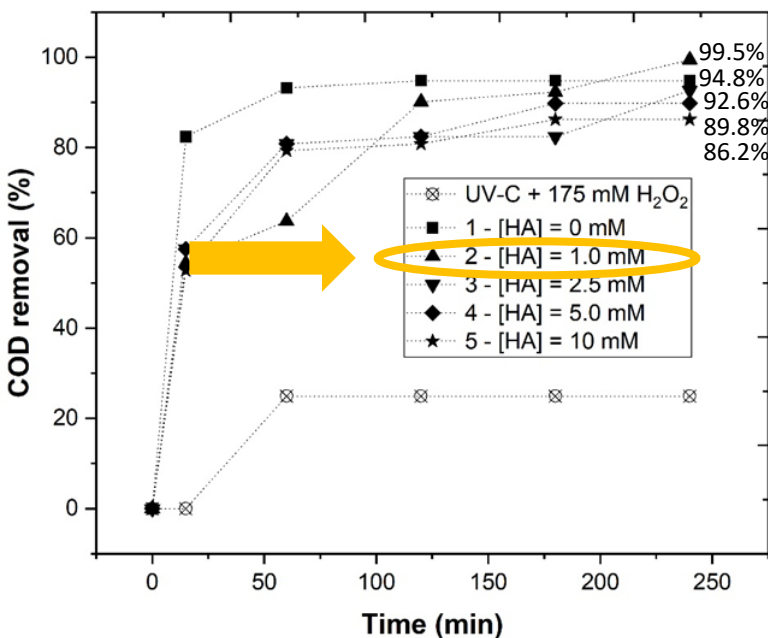

Effect of hydroxy/amine concentration

Effect of radiation type

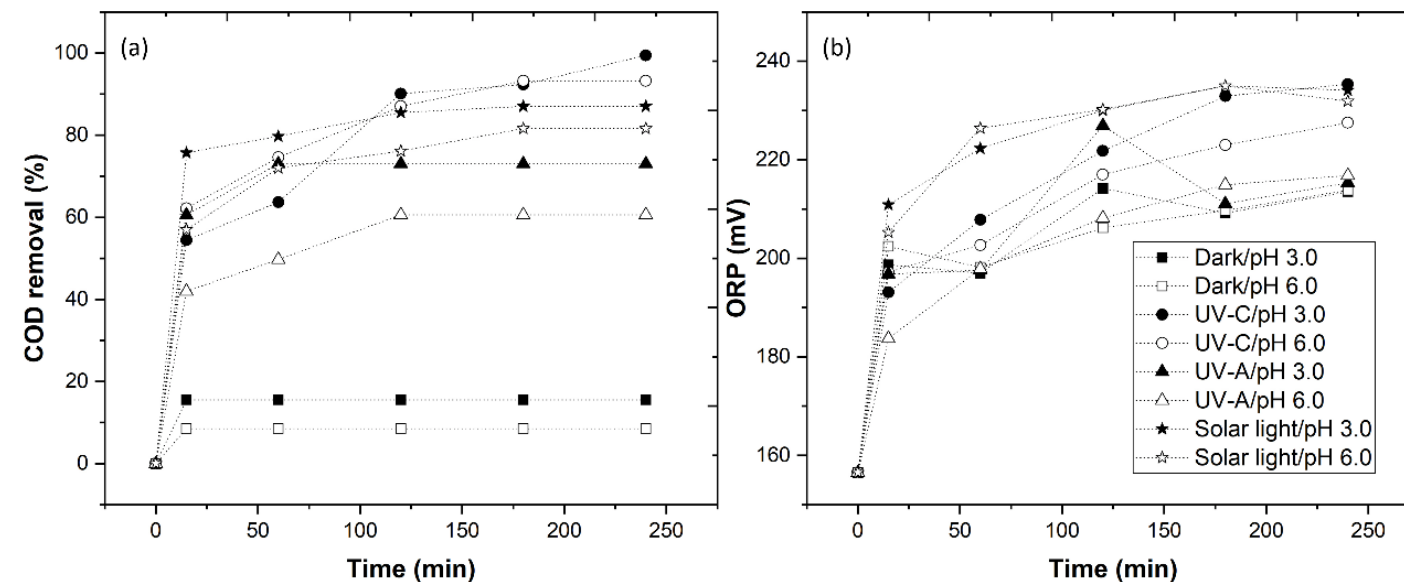

Evolution of the (a) COD removal, (b) ORP value through the photo-Fenton experiments, under the influence of different UV sources at pH 3.0 and 6.0.

Evolution of COD removal through the photo-Fenton experiments, using different HA concentration.



Based in the results it is concluded

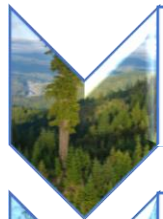

- 1. The application of 175 mM  $\text{H}_2\text{O}_2$  achieves a high COD removal (82.5%), high  $\text{HO}^\bullet$  radical production (240.3 mV) and low metal leaching (1.79 mg Fe/L)

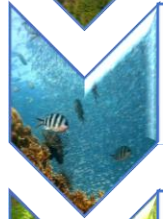

- 2. The type of catalyst has a great influence in the organic matter removal, and that the  $\text{Fe}^{2+}$  is concluded to be the most efficient catalyst

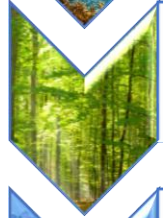

- 3. The radicals generation are greatly promoted with the addition of hydroxylamine and the molar ratio of EDDS-Fe/HA system (1/5/1) achieves higher COD removal (99.4%)

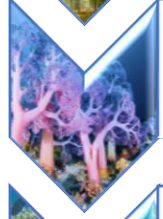

- 4. With application of the  $\text{Fe}^{2+}$ -EDDS/HA system it is concluded that the photo-Fenton process at pH 6.0 achieves similar COD reductions regarding pH 3.0.

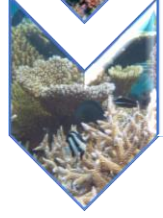

- 5. The solar radiation achieves similar COD removal than UV-A radiation and is concluded to be a viable alternative.

# Acknowledgements

- The authors thank the North Regional Operational Program (NORTE 2020) and the European Regional Development Fund (ERDF), and express their appreciation for the financial support of the Project AgriFood XXI, operation nº NORTE-01-0145-FEDER-000041, and to the Fundação para a Ciência e a Tecnologia (FCT) for the financial support provided to CQVR through UIDB/00616/2020. Ana R. Teixeira also thanks the FCT for the financial support provided through the Bolsa de Doutoramento UI/BD/150847/2020.

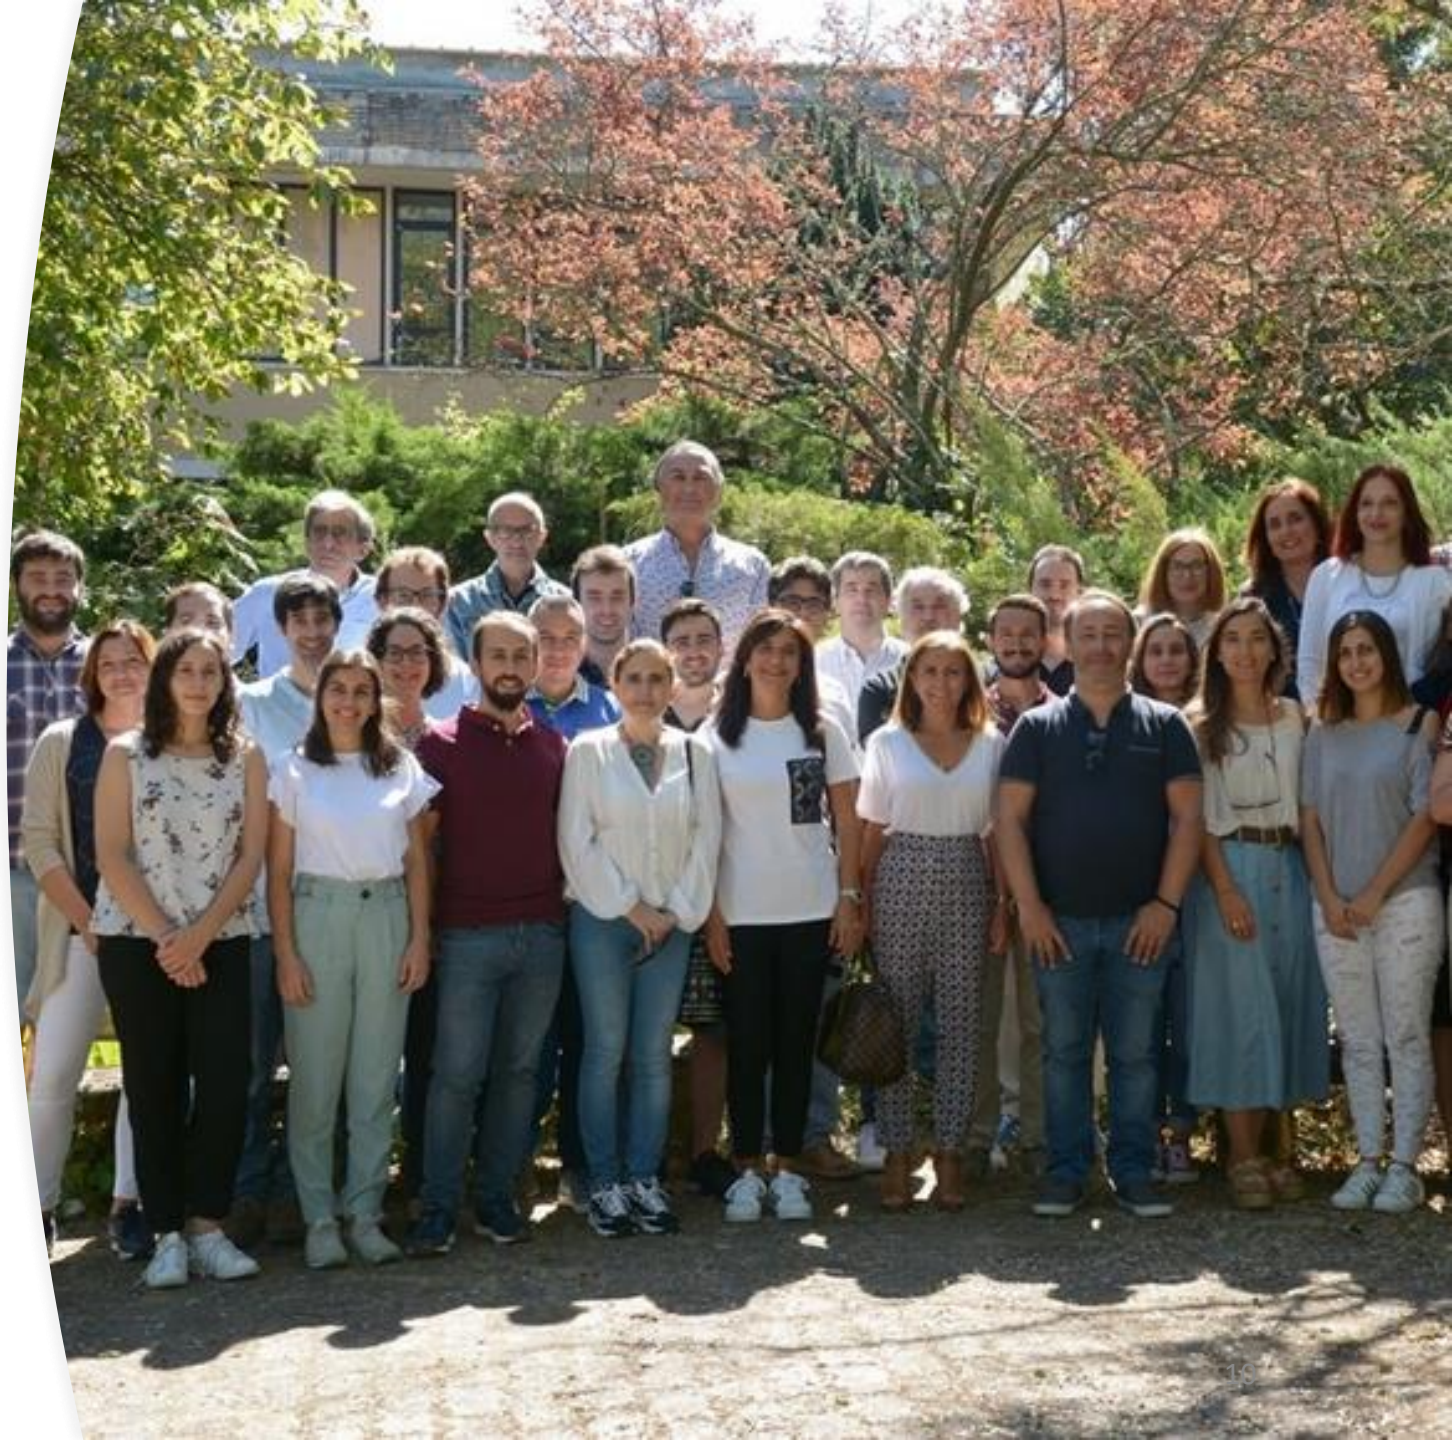

Thank you for  
your attention

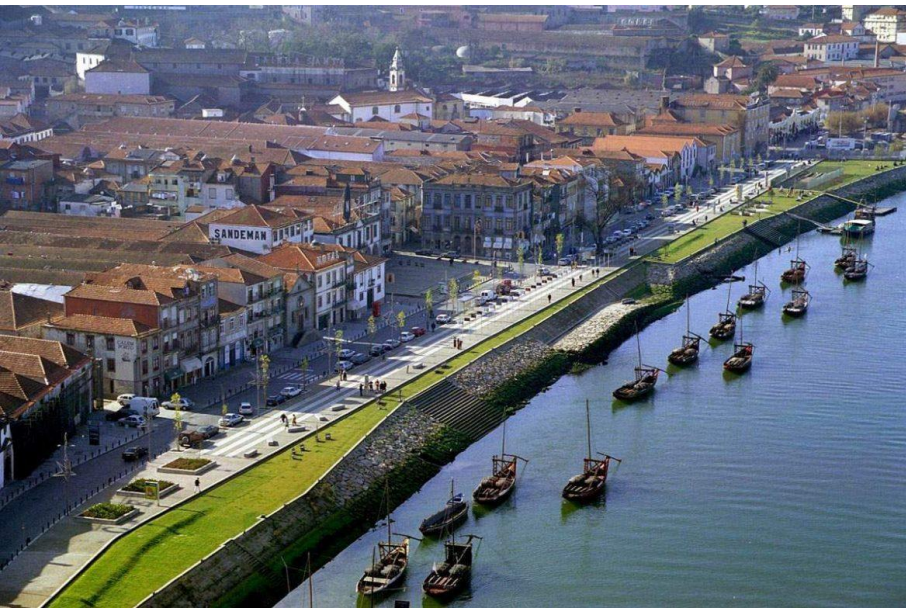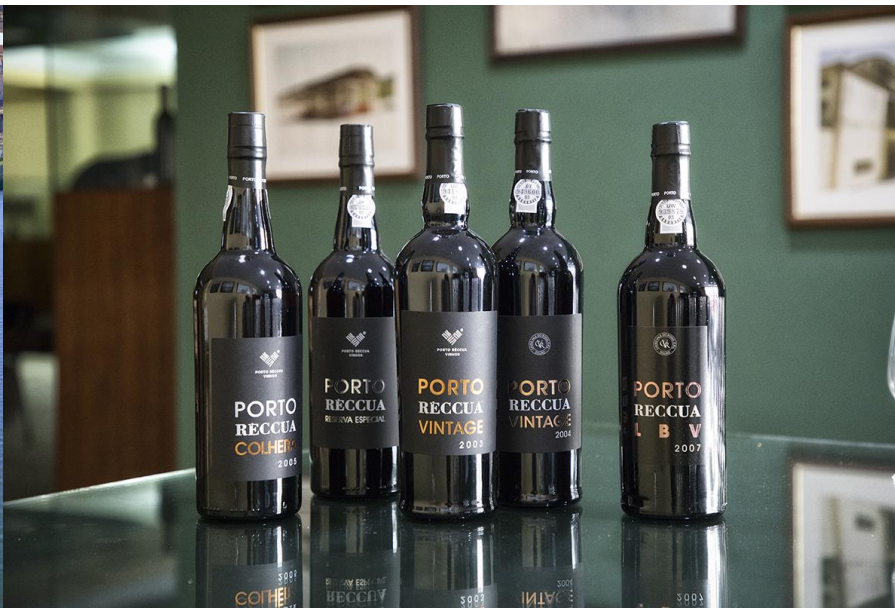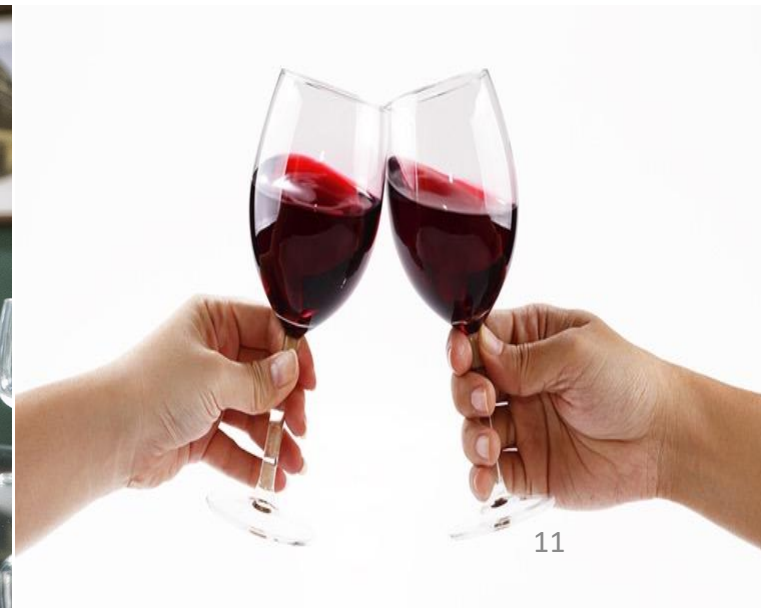

Supplement: s1 [file s1]
